# Supplementary material
Source: publisher figshare collection journal article supplement (https://acs.figshare.com/ndownloader/files/3851506)
Supplement: Supplementary file 1 [file 3851506]

## **SUPPORTING INFORMATION**

# **Chemiluminescent Labels Released from Long Spacer Arm-Functionalized Magnetic Particles: A Novel Strategy for Ultrasensitive and Highly Selective Detection of Infectious Pathogens**

Haowen Yang,<sup>†</sup> Wenbiao Liang,<sup>‡</sup> Nongyue He,<sup>\*,†</sup> Yan Deng,<sup>†</sup> and Zhiyang Li<sup>\*,§</sup>

<sup>†</sup>State Key Laboratory of Bioelectronics, School of Biological Science and Medical Engineering, Southeast University, Nanjing 210096, China

<sup>‡</sup>Jiangsu Province Blood Center, Nanjing 210042, China

<sup>§</sup>Department of Laboratory Medicine, Second Affiliated Hospital of Nanjing Medical University, Nanjing 210011, China

## **AUTHOR INFORMATION**

### **Corresponding Author**

\*E-mail: nyhe1958@163.com. Phone and Fax: 86-25-83790885.

\*E-mail: lizhiyangcn@qq.com.

### **Author Contributions**

H. Y. and W. L. contributed equally to this work.

## CL Detection of SA-AP and MPs

Chemiluminescent (CL) intensity was detected by a 2030 Multilabel Plate Reader (PerkinElmer). Figure S1 indicated that CL intensity in the system of AP and AMPPD was significantly limited by the inner filter-like effect arising from excess dark magnetic particles (MPs).

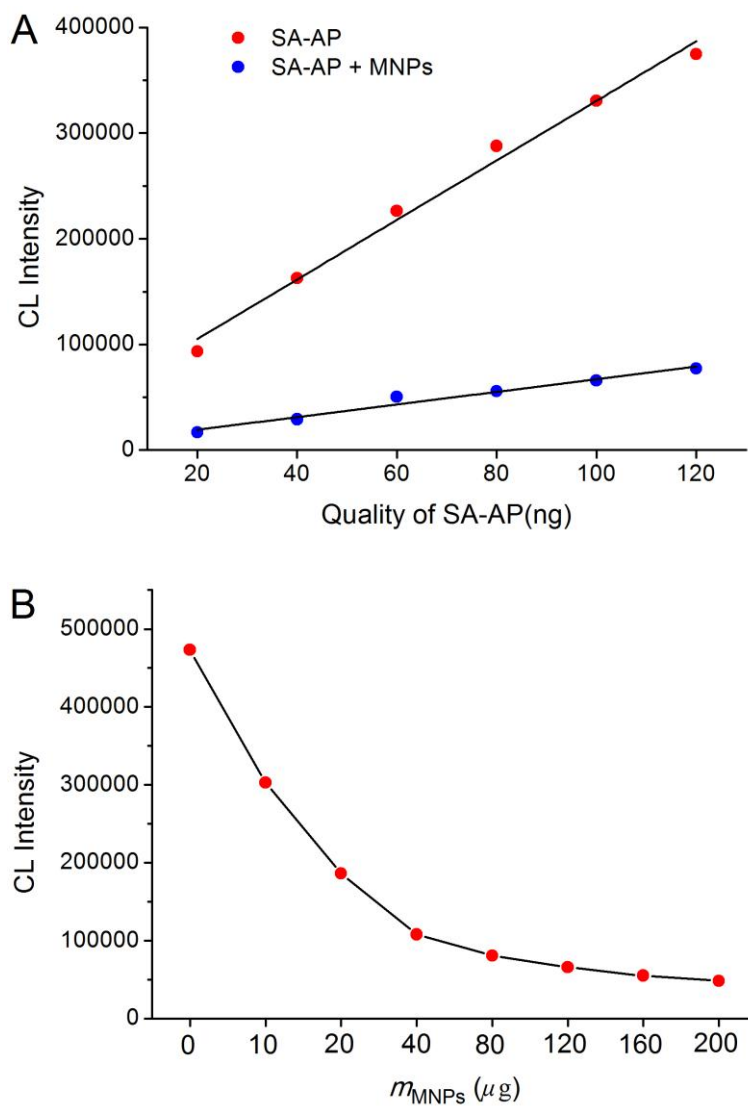

**Figure S1.** (A) CL intensity versus the amount of streptavidin-alkaline phosphatase (SA-AP) without MPs (red circles) and with 200  $\mu\text{g}$  of MPs (blue circles). (B) CL intensity versus the amount of MPs with 160 ng of SA-AP. The detection procedure was carried out as described in the experimental section.

### Primer and Probe Design.

The primers and probe for HBV detection were designed using Premier Primer 5 software (PREMIER Biosoft). The sequence information was listed in Table S1.

**Table S1.** Oligonucleotide sequences of the primers and probe used for the detection of HBV.

| Target | Sequence Name | Sequence (5'–3')                                            | Amplicon Size |
|--------|---------------|-------------------------------------------------------------|---------------|
| Primer | X_forward     | CCTCTACCGTCCCCTTCTTCA                                       | 126 bp        |
|        | X_reverse     | ACGTGCAGAGGTGAAGCGAAG                                       |               |
| Probe  | X_Probe       | CACTTCGCTTCACCTCTGCACGTA-(T) <sub>15</sub> -NH <sub>2</sub> |               |

## Characterization

(a) *TEM and SEM Images* The morphology and particle size of the MPs samples were determined by TEM with a JEM2200CX transmission electronic microscope and by SEM with a Hitachi-S100 scanning electron microscope. But Figure S2A suggested that no obvious distinction was found between before and after CMG modification.

(b) *Dynamic Light Scattering Analysis.* The hydrodynamic sizes of the MPs samples were determined by dynamic light scattering (DLS) using a nano Zetasizer Nano ZSP (Marlven, Ltd). Figure S2B showed that the average hydrodynamic size was CMG-MPs 677.9 nm in MPs and 772.2 nm in CMG-MPs.

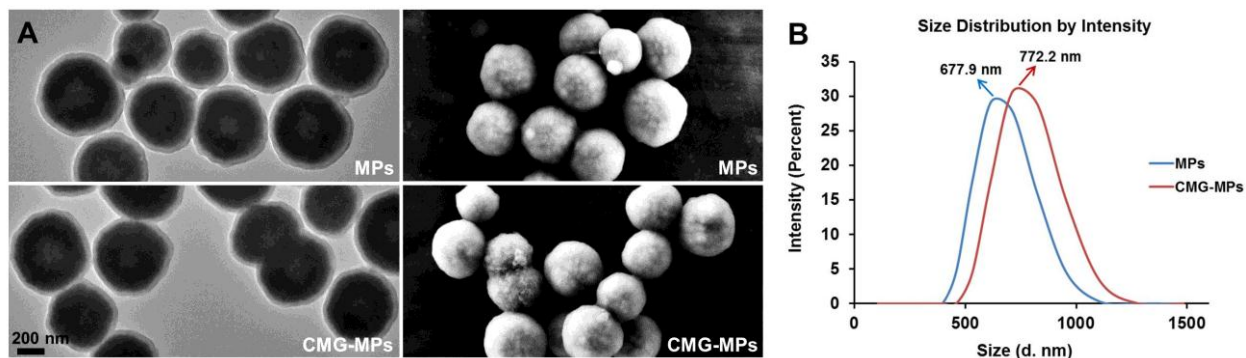

**Figure S2.** (A) TEM image (a) and SEM image (b). (B) The hydrodynamic sizes by DLS.

### Gel Electrophoresis Analysis of HBV Amplicons

The PCR products containing HBV amplicons were analyzed by gel electrophoresis. Figure S3 presented clear bands with a size of 126 bp, which proved the successful formation of the biotinylated HBV amplicons and the lack of formation of nontarget amplicons.

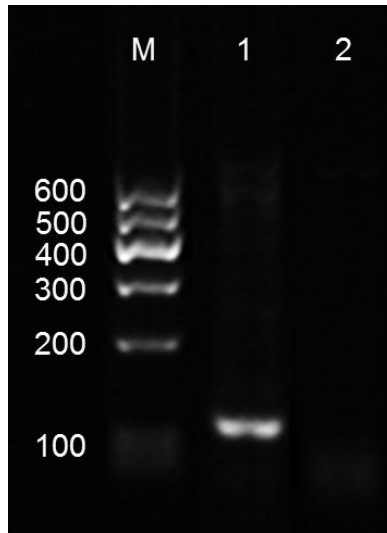

**Figure S3.** Image of the gel after electrophoresis of PCR products showing the target band of the biotinylated HBV amplicon. Lane M: DNA markers (100–600 bp). Lane 1: the biotinylated HBV amplicon (126 bp) is visible. Lane 2: blank control; the HBV DNA template was replaced with deionized water. The PCR assay was carried out as described in the experimental section.

### Pre-Experiment for DNase Degradation-Based CL Detection

In the pre-experiment, 15 U of DNase I were employed to degrade DNA for different time periods (10–30 min) according to the manufacturer's instructions, but Figure S4 indicated no obvious difference in CL intensity.

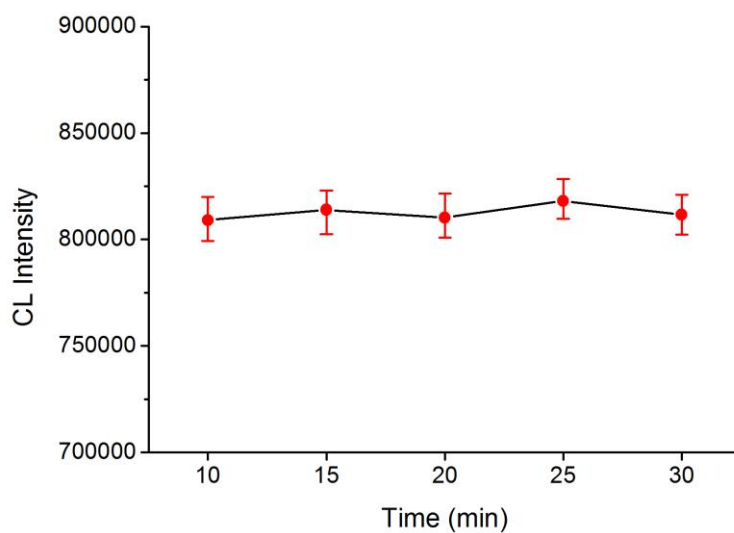

**Figure S4.** CL intensity versus DNase degradation time. The detection procedure was carried out as described in the experimental section. Error bar: standard deviation of three independent measurements.

### Optimization of Assay Parameters for CMPs-Based CL Detection

The concentration of DNA-capture probes, hybridization temperature, and hybridization time for carboxylated MPs (CMPs)-based HBV detection were investigated by monitoring the changes in CL intensities. Figure S5 illustrated that the optimal conditions for CMP-based HBV detection were 2  $\mu$ M probe concentration, 50°C hybridization temperature, and 30 min hybridization time.

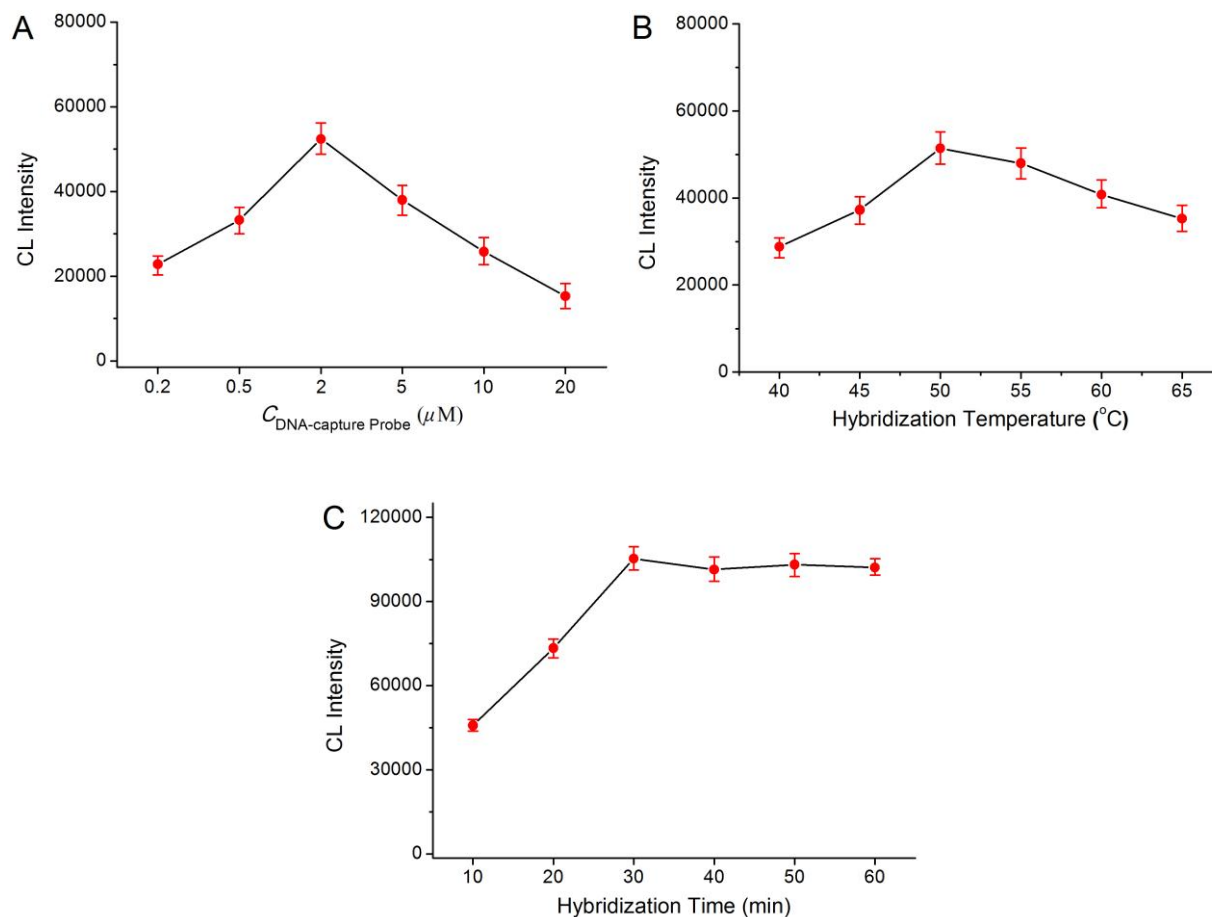

**Figure S5.** Optimization of assay parameters for the detection of HBV using CMPs. CL intensity versus the concentration of DNA-capture probe (A), hybridization temperature (B), and hybridization time (C). The detection procedure was carried out as described in the experimental section. Error bar: standard deviation of three independent measurements.
